# Supplementary material for: Innovative Family-Based Genetically Informed Series of Analyses of Whole-Exome Data Supports Likely Inheritance for Grammar in Children with Specific Language Impairment
Source: MDPI journal article supplement (doi:10.3390/children10071119), 2023-06-28
Supplement: s1 [file s1]

**Table S1.***Candidate Gene List (n = 113, based on a combination of recent reviews).*

| <b>Gene</b>     | <b>Phenotype associated</b>                          | <b>Review article or original article</b>                                              |
|-----------------|------------------------------------------------------|----------------------------------------------------------------------------------------|
| <i>ABCC13</i>   | DLD/SLI                                              | Chen et al., 2017; Mountford et al., 2019                                              |
| <i>ANKK1</i>    | SSD                                                  | Guerra et al., 2019                                                                    |
| <i>ANKR12</i>   | CAS                                                  | Guerra et al., 2019                                                                    |
| <i>AP4E1</i>    | ST                                                   | Guerra et al., 2019                                                                    |
| <i>APOE</i>     | AP (aphasia)                                         | Guerra et al., 2019                                                                    |
| <i>ARHGEF39</i> | DLD/SLI                                              | Mountford et al., 2019                                                                 |
| <i>ARL17</i>    | DL                                                   | Guerra et al., 2019                                                                    |
| <i>ATP13A4</i>  | CAS                                                  | Guerra et al., 2019                                                                    |
| <i>ATP2C2</i>   | DLD/SLI, ASD                                         | Chen et al., 2017; Guerra et al., 2019; Mountford et al., 2019; Mountford et al., 2022 |
| <i>AUTS2</i>    | ASD                                                  | Chen et al., 2017; Mountford et al., 2019                                              |
| <i>BCL11A</i>   | CAS with expressive language and mild language delay | Mountford et al., 2019; Mountford et al., 2022                                         |
| <i>BDNF</i>     | SSD                                                  | Guerra et al., 2019                                                                    |
| <i>BIRC6*</i>   | DLD/SLI                                              | Chen et al., 2017                                                                      |
| <i>C2ORF3</i>   | DL                                                   | Guerra et al., 2019                                                                    |
| <i>CDH18</i>    | CAS                                                  | Guerra et al., 2019                                                                    |
| <i>CHD3</i>     | CAS, DLD                                             | Guerra et al., 2019; Mountford et al., 2019; Mountford et al., 2022                    |
| <i>CHRNA3</i>   | SSD                                                  | Guerra et al., 2019                                                                    |
| <i>CMIP</i>     | DLD/SLI, DL, ASD                                     | Chen et al., 2017; Guerra et al., 2019; Mountford et al., 2019                         |
| <i>CNTNAP1</i>  | CAS                                                  | Guerra et al., 2019                                                                    |
| <i>CNTNAP2</i>  | DLD/SLI, CAS, ST, DT, ASD                            | Chen et al., 2017; Guerra et al., 2019; Mountford et al., 2019; Mountford et al., 2022 |
| <i>CNTNAP5</i>  | ASD, DL                                              | Chen et al., 2017; Mountford et al., 2019                                              |
| <i>COL4A2</i>   | DLD/SLI                                              | Guerra et al., 2019                                                                    |
| <i>COMT</i>     | DL                                                   | Guerra et al., 2019                                                                    |
| <i>CTTNBP2</i>  | ASD                                                  | Guerra et al., 2019                                                                    |
| <i>CYP19A1</i>  | SSD                                                  | Guerra et al., 2019                                                                    |
| <i>DCDC2</i>    | SSD, DL                                              | Chen et al., 2017; Guerra et al., 2019; Mountford et al., 2019                         |
| <i>DGKI</i>     | DL                                                   | Guerra et al., 2019                                                                    |
| <i>DOCK4</i>    | ASD, DL                                              | Chen et al., 2017; Mountford et al., 2019                                              |
| <i>DRD2</i>     | SSD                                                  | Guerra et al., 2019                                                                    |
| <i>DYM</i>      | DL                                                   | Guerra et al., 2019                                                                    |
| <i>DYX1C1</i>   | DL, SSD                                              | Chen et al., 2017; Guerra et al., 2019; Mountford et al., 2019                         |
| <i>DYX2</i>     | DL, ASD                                              | Guerra et al., 2019                                                                    |
| <i>DYX3</i>     | DL                                                   | Guerra et al., 2019                                                                    |
| <i>DYX5</i>     | DL, SSD                                              | Guerra et al., 2019                                                                    |
| <i>DYX6</i>     | DL                                                   | Guerra et al., 2019                                                                    |
| <i>DYX8</i>     | DL, SSD                                              | Guerra et al., 2019                                                                    |
| <i>DYX9</i>     | DL                                                   | Guerra et al., 2019                                                                    |
| <i>ELKS</i>     | CAS                                                  | Guerra et al., 2019                                                                    |
| <i>ELP4</i>     | SSD                                                  | Guerra et al., 2019                                                                    |
| <i>EN2</i>      | ASD                                                  | Guerra et al., 2019                                                                    |
| <i>ERC1</i>     | CAS                                                  | Chen et al., 2017; Mountford et al., 2019; Mountford et al., 2022                      |
| <i>FAT3*</i>    | DLD/SLI                                              | Chen et al., 2017                                                                      |
| <i>FLCN</i>     | CAS                                                  | Guerra et al., 2019                                                                    |
| <i>FLNB*</i>    | DLD/SLI                                              | Chen et al., 2017                                                                      |
| <i>FLNC</i>     | DL                                                   | Mountford et al., 2019                                                                 |

| <b>Gene</b>                  | <b>Phenotype associated</b>                             | <b>Review article or original article</b>                                              |
|------------------------------|---------------------------------------------------------|----------------------------------------------------------------------------------------|
| <i>FOXP1</i>                 | CAS, DT, DLD/SLI, ASD                                   | Chen et al., 2017; Guerra et al., 2019; Mountford et al., 2019;                        |
| <i>FOXP2</i>                 | CAS, SSD                                                | Mountford et al., 2022                                                                 |
| <i>GCFC2</i>                 | ASD                                                     | Guerra et al., 2019                                                                    |
| <i>GLI3</i>                  | AP (aphasia)                                            | Guerra et al., 2019                                                                    |
| <i>GLP2R</i>                 | CAS, ASD                                                | Guerra et al., 2019                                                                    |
| <i>GNPTAB</i>                | ST                                                      | Guerra et al., 2019                                                                    |
| <i>GNPTG</i>                 | ST                                                      | Guerra et al., 2019                                                                    |
| <i>GRIN2A</i>                | focal epilepsy with speech disorder, with or without ID | Chen et al., 2017; Mountford et al., 2019; Mountford et al., 2022                      |
| <i>GRIN2B</i>                | ID, ASD                                                 | Chen et al., 2017; Mountford et al., 2019                                              |
| <i>GRN</i>                   | AP (aphasia)                                            | Guerra et al., 2019                                                                    |
| <i>HRAS</i>                  | ASD                                                     | Guerra et al., 2019                                                                    |
| <i>IDO2</i> <sup>^</sup>     | DLD/SLI                                                 | Chen et al., 2017                                                                      |
| <i>KAT6A</i>                 | CAS                                                     | Guerra et al., 2019; Mountford et al., 2019; Mountford et al., 2022                    |
| <i>KIAA0319</i>              | DL, SSD, DLD/SLI, CAS, ASD                              | Chen et al., 2017; Guerra et al., 2019; Mountford et al., 2019                         |
| <i>KIAA0586</i> <sup>*</sup> | DLD/SLI                                                 | Chen et al., 2017                                                                      |
| <i>KIAA1267</i>              | DL                                                      | Guerra et al., 2019                                                                    |
| <i>KMT2D</i> <sup>*</sup>    | DLD/SLI                                                 | Chen et al., 2017                                                                      |
| <i>LRRC37A</i>               | DL                                                      | Guerra et al., 2019                                                                    |
| <i>MC5R</i>                  | DL                                                      | Guerra et al., 2019                                                                    |
| <i>MED13L</i>                | ASD                                                     | Guerra et al., 2019                                                                    |
| <i>MET</i>                   | ASD                                                     | Guerra et al., 2019                                                                    |
| <i>MKL2</i>                  | CAS                                                     | Mountford et al., 2019                                                                 |
| <i>MRPL19</i>                | DL                                                      | Guerra et al., 2019                                                                    |
| <i>MUC6</i> <sup>^</sup>     | DLD/SLI                                                 | Chen et al., 2017                                                                      |
| <i>MYO10</i>                 | CAS                                                     | Guerra et al., 2019                                                                    |
| <i>MYO16</i> <sup>*</sup>    | DLD/SLI                                                 | Chen et al., 2017                                                                      |
| <i>MYO19</i> <sup>*</sup>    | DLD/SLI                                                 | Chen et al., 2017                                                                      |
| <i>NAGPA</i>                 | ST                                                      | Guerra et al., 2019                                                                    |
| <i>NBEA</i>                  | ASD                                                     | Guerra et al., 2019                                                                    |
| <i>NCOR1</i>                 | CAS                                                     | Guerra et al., 2019                                                                    |
| <i>NDST4</i>                 | DLD/SLI                                                 | Guerra et al., 2019; Mountford et al., 2019                                            |
| <i>NEDD4L</i>                | DL                                                      | Guerra et al., 2019                                                                    |
| <i>NEK8</i>                  | CAS                                                     | Guerra et al., 2019                                                                    |
| <i>NFXL1</i>                 | DLD/SLI                                                 | Chen et al., 2017; Guerra et al., 2019; Mountford et al., 2019; Mountford et al., 2022 |
| <i>NIPBL</i>                 | CAS                                                     | Guerra et al., 2019                                                                    |
| <i>NOP9</i>                  | DLD/SLI                                                 | Guerra et al., 2019; Mountford et al., 2019                                            |
| <i>NSF</i>                   | DL                                                      | Guerra et al., 2019                                                                    |
| <i>NSFPI</i>                 | DL                                                      | Guerra et al., 2019                                                                    |
| <i>NUDT16L1</i> <sup>^</sup> | DLD/SLI                                                 | Chen et al., 2017                                                                      |
| <i>OR52B2</i> <sup>*^</sup>  | DLD/SLI                                                 | Chen et al., 2017                                                                      |
| <i>OR6P1</i> <sup>^</sup>    | DLD/SLI                                                 | Chen et al., 2017                                                                      |
| <i>OXR1</i> <sup>^</sup>     | DLD/SLI                                                 | Chen et al., 2017                                                                      |
| <i>PALB2</i> <sup>*</sup>    | DLD/SLI                                                 | Chen et al., 2017                                                                      |
| <i>PAX6</i>                  | SSD                                                     | Guerra et al., 2019                                                                    |
| <i>PCDH11X</i>               | DL                                                      | Guerra et al., 2019                                                                    |
| <i>PSEN1</i>                 | AP (aphasia)                                            | Guerra et al., 2019                                                                    |
| <i>PTEN</i>                  | ASD                                                     | Guerra et al., 2019                                                                    |
| <i>RBFOX2</i>                | DLD/SLI with DL                                         | Guerra et al., 2019; Mountford et al., 2019                                            |
| <i>ROBO1</i>                 | SSD, DL, ASD                                            | Chen et al., 2017; Guerra et al., 2019; Mountford et al., 2019                         |

| <b>Gene</b>    | <b>Phenotype associated</b>            | <b>Review article or original article</b>                                              |
|----------------|----------------------------------------|----------------------------------------------------------------------------------------|
| <i>ROBO2</i>   | DLD/SLI, DL                            | Guerra et al., 2019; Mountford et al., 2019                                            |
| <i>SCN9A*</i>  | DLD/SLI                                | Chen et al., 2017                                                                      |
| <i>SEMA6D</i>  | DLD/SLI                                | Chen et al., 2017; Mountford et al., 2019                                              |
| <i>SETBP1</i>  | CAS, DLD/SLI                           | Chen et al., 2017; Guerra et al., 2019; Mountford et al., 2019; Mountford et al., 2022 |
| <i>SETD1A</i>  | CAS                                    | Guerra et al., 2019; Mountford et al., 2019; Mountford et al., 2022                    |
| <i>SETX</i>    | CAS, DT                                | Guerra et al., 2019                                                                    |
| <i>SMCR8</i>   | CAS                                    | Guerra et al., 2019                                                                    |
| <i>SRPX2</i>   | DLD/SLI, ASD, Rolandic seizures and ID | Chen et al., 2017; Guerra et al., 2019; Mountford et al., 2022                         |
| <i>STARD9*</i> | DLD/SLI                                | Chen et al., 2017                                                                      |
| <i>SYNPR^</i>  | DLD/SLI                                | Chen et al., 2017                                                                      |
| <i>TDP-43</i>  | AP (aphasia)                           | Guerra et al., 2019                                                                    |
| <i>TM4SF20</i> | DLD/SLI                                | Mountford et al., 2019; Mountford et al., 2022                                         |
| <i>TNRC6B</i>  | CAS                                    | Guerra et al., 2019; Mountford et al., 2019; Mountford et al., 2022                    |
| <i>TTRAP</i>   | DL                                     | Guerra et al., 2019                                                                    |
| <i>WDR5</i>    | CAS                                    | Guerra et al., 2019; Mountford et al., 2019; Mountford et al., 2022                    |
| <i>ZFH4</i>    | CAS                                    | Guerra et al., 2019; Mountford et al., 2019; Mountford et al., 2022                    |
| <i>ZGRF1</i>   | CAS                                    | Guerra et al., 2019                                                                    |
| <i>ZNF385D</i> | DLD/SLI                                | Guerra et al., 2019                                                                    |
| <i>ZNF277</i>  | DLD/SLI                                | Ceroni et al., 2014; Mountford et al., 2022                                            |

*Note.* \*genes with more than 1 variant in a single SLI proband from the SLI Consortium (not from Chen et al., 2017 list of candidate genes), ^genes with a stop gain variant in SLI proband from the SLI Consortium (not from Chen et al., 2017 list of candidate genes), we have also noted any genes referenced in a more recent review (Mountford et al., 2022), DLD/SLI-developmental language disorder/specific language impairment, DL-dyslexia, CAS-childhood apraxia of speech, ST-stuttering, SSD-other speech sound disorders, AP-aphasia, DT-dysarthria, and ASD-autism spectrum disorder

**Table S2.**

*Distribution of Affectedness Across the Four Possible Phenotypes in the Whole exome Sequenced Individuals (n = 34).*

| Total | TEGI affected status totals | TEGI composite | TEGI screener | Omnibus      | PPVT         |
|-------|-----------------------------|----------------|---------------|--------------|--------------|
| 19    |                             | -              | -             | -            | -            |
| 1     | 23                          | -              | -             | -            | +            |
| 2     | Composite & screener AFF    | -              | -             | +            | -            |
| 1     |                             | -              | -             | +            | +            |
| 2     | 4                           | -              | +             | -            | +            |
| 2     | composite AFF only          | -              | +             | -            | -            |
| 1     | 1 only screener avail AFF   | missing*       | -             | -            | +            |
| 1     | 6                           | +              | +             | -            | -            |
| 2     | UNAFF on TEGI               | +              | +             | -            | +            |
| 1     | composite + screener        | +              | +             | +            | -            |
| 2     |                             | +              | +             | +            | +            |
| 34    | 34                          | 27/33*<br>AFF  | 24/34<br>AFF  | 28/34<br>AFF | 25/34<br>AFF |

*Note.* \*proband (ID#: M3287). TEGI affectedness was based on a Z score that was calculated using the data provided in the test manual. A child with a Z score  $\leq -1$  was considered affected on the TEGI.

**Table S3.***Distribution of Affectedness Across the Four Possible Phenotypes in the Additional Probands (n = 146).*

| Total | TEGI affected<br>status totals | TEGI<br>composite | TEGI<br>screener | Omnibus        | PPVT           |
|-------|--------------------------------|-------------------|------------------|----------------|----------------|
| 77    |                                | -                 | -                | -              | -              |
| 24    | 108                            | -                 | -                | -              | +              |
| 3*    | Composite &<br>screener AFF    | -                 | -                | +              | -              |
| 4*    |                                | -                 | -                | +              | +              |
| 9     |                                | -                 | +                | -              | -              |
| 5     | 15                             | -                 | +                | -              | +              |
| 1*    | Composite<br>AFF only          | -                 | +                | +              | -              |
| 2     | 2                              | +                 | -                | -              | -              |
|       | Screener AFF<br>only           |                   |                  |                |                |
| 11    | 21                             | +                 | +                | -              | +              |
|       | UNAFF on<br>TEGI               |                   |                  |                |                |
| 10    | composite +<br>screener        | +                 | +                | -              | -              |
| 146   | 146                            | 123/146<br>AFF    | 110/146<br>AFF   | 138/146<br>AFF | 102/146<br>AFF |

*Note.* \*Given the primary interest in morphosyntax in the larger longitudinal project, entrance criteria were sensitive to the possibility that some children would have low morphosyntax abilities but perform better on an omnibus standardized language measure. Therefore, eight of the children were entered on the basis of their low performance on TEGI, despite their average performance on an omnibus standardized language measure.

**Table S4.***Family-specific Criteria for ‘family-specific variant comparison lists.’*

| Family | Family-specific criteria                                                                                                                                                  |
|--------|---------------------------------------------------------------------------------------------------------------------------------------------------------------------------|
|        | Removed: variants shared by both parents                                                                                                                                  |
| 4093   | Removed: variants M3330 (persistently low NV-IQ) shared with three or fewer of the other siblings (all affected on the TEGI)                                              |
| 4130   | No family-specific criteria for ‘family-specific variant comparison lists’                                                                                                |
|        | Removed: variants only shared by individuals in one branch (exception: no GTs called in one branch – accounts for subtle differences in the two rounds of WES)            |
| 4132   | Removed: variants shared by > 5 of the family members with an unknown TEGI phenotype                                                                                      |
| 4075   | Removed: variants shared by both parents and the half-sibling (M3062)                                                                                                     |
| 4379   | Kept: only variants with a 0/0 WT genotype in M4304 (unaffected on the TEGI)                                                                                              |
| 5463   | Removed: variants shared by both siblings unaffected on the TEGI (M8335, M7769)                                                                                           |
|        | Removed: variants shared by both parents                                                                                                                                  |
| 5886   | Removed: variants shared by > 4 of the family members with an unknown TEGI phenotype                                                                                      |
|        | Removed: variants shared by > 3 of the family members with an unknown TEGI phenotype (A093 considered unknown – removed from WES filtering due to persistently low NV-IQ) |
| 5931   | Removed: variants shared by both siblings unaffected on the TEGI (A0981, A0982)                                                                                           |

**Table S5.***Family-specific Criteria applied for ‘co-segregating variant lists.’*

| Family | Family-specific criteria                                                                                                           |
|--------|------------------------------------------------------------------------------------------------------------------------------------|
| 4093   | Kept: variants shared by all four siblings affected on the TEGI                                                                    |
| 4130   | Kept: variants the two siblings share with their mother (mother showed low performance on a standardized omnibus language measure) |
| 4132   | Removed: variants not shared by the proband (M3387) and their child (M4950), both are affected on the TEGI                         |
| 4075   | Kept: variants shared by at least three of the four siblings affected on the TEGI                                                  |
| 4379   | Removed: variants not observed in the proband’s cousin (M8841), who is affected on the TEGI                                        |
| 5463   | Removed: variants observed in either sibling unaffected on the TEGI (M8335, M7769)                                                 |
| 5886   | Kept: variants shared by all four siblings affected on the TEGI                                                                    |
| 5931   | No family-specific criteria for ‘co-segregating variant lists’                                                                     |

**Table S6.***Primers used for confirmation via sequencing.*

| Family                 | Prioritization Workflow | Gene          | Chr | Variant Location (hg38) | Forward Primer          | Reverse Primer         | PCR product size | Optimized Tm  | Direction for seq |
|------------------------|-------------------------|---------------|-----|-------------------------|-------------------------|------------------------|------------------|---------------|-------------------|
| 4093                   | Whole-exome wide        | <i>BAHCC1</i> | 17  | 81461957                | CCACACCCATATTTGGCAAC    | gtttccttgggaaccaggag   | 996*             | 54°+DMSO      |                   |
| 5931                   |                         |               |     |                         | CCACACCCATATTTGGCAAC    | CTTCTGTCTTGGCCACAA     | 338^             | 55°           | Rev               |
| 4093                   |                         | <i>GPT</i>    | 8   | 81461259                | TGCTTCCTGTCCAGGGCCAC    | gagaggggaaggcagcagg    | 300              | 61°+ DMSO     | Fwd               |
| 5886                   |                         |               |     | 144506908               | cacagGAGAAGCAGGCAGTG    | ctcctgagcacacagtcag    | 555              | Not optimized | NA                |
| 4093                   |                         |               |     | 144506631               |                         |                        |                  |               | NA                |
| 4093                   |                         |               |     | 75625226                | gcctctagagccaccaactg    | gtgcctattgtgggcaagac   | 395              | 56°           | Fwd               |
| 4132                   |                         | <i>MYO15B</i> | 17  | 75589672                | AGCGTTGCGCCTGGCTGGCT    | ACGAGGCCAACCTCGGCCTCCC | 247              | 58°+ DMSO     | Fwd               |
| 4075                   |                         |               |     | 75621145                | ggcaccagggtttctgtgat    | caggcaggagagtgctaag    | 277              | Not optimized | NA                |
|                        |                         |               |     | 75619800                | cttcctgtagGGCGAGAGTG    | tcgctcttcagtgacagctc   | 274              | 56°           | Rev               |
| 4093, 5886             |                         | <i>PCDH12</i> | 5   | 141945390               | CGGGAGGACCCTCAGTTTAG    | cagtcaccctaaagtctcagg  | 250              | 56°           | Fwd               |
| 4093, 4130             |                         | <i>PCDHB3</i> | 5   | 141100891               | TGTGGCTGAGGAAAAAGAGAA   | TTGCAAAGGGTTTTGCAGTA   | 244              | 56°           | Rev               |
| 5463, 5886             |                         | <i>PDHA2</i>  | 4   | 95841007                | AGCAGCAGCCAGCCCTGATTAC  | CCACAGTGGCGAGCTTGCTGT  | 293              | 56°           | Fwd               |
| 4093, 4132             |                         | <i>RBM26</i>  | 13  | 79344671                | aggatatcatgaacggctga    | cagtggcagccaacaacac    | 299              | 56°           | Rev               |
| 4132, 4075, 4379, 5886 |                         | <i>SYCP1</i>  | 1   | 114994979               | ccaccagcttctcatcttgt    | tttggtcttggaataaagaa   | 352              | 56°           | Rev               |
| 4130, 4379             |                         | <i>ZNF226</i> | 19  | 44176298                | TGGGAGAAAACTTAAGTGTGATG | TGAGCTACAAATGAAGCCCTTA | 389              | 56°           | Fwd               |
| 4093                   |                         | <i>HS6ST1</i> | 2   | 128318170               | CCCCACTACGAGAAGAAGTA    | gaagagagtgagagcgaggt   | 568              | 53°+ DMSO     | Fwd               |
| 4130, 4075             |                         |               |     | 128318223               |                         |                        |                  |               | Rev               |
| 4093                   |                         | <i>IQGAP3</i> | 1   | 156551755               | tcagaagggtgattttgtgt    | caagcagaaaagggtcagag   | 250              | 56°           | Fwd               |
| 5886                   |                         |               |     | 156548686               | ctctttcttagGGTTCCTTG    | cagactgggtacagtgaac    | 360              | 56°           | Rev               |
| 4132                   |                         |               |     | 75857098                | attctcatgacctttggt      | GGATGATGTTTCAAAGGAA    | 250              | 56°           | Rev               |
| 5463                   |                         | <i>MYO6</i>   | 6   | 75830425                | cattgttgcaacagaagaaa    | GCCTTTCCTCCTCTTCCTTT   | 288              | 56°           | Fwd               |
| 4379                   |                         |               |     | 75890140                | gatcagggaatactcagggaat  | cCAATTGCAAAGACATGAGG   | 264              | 56°           | Rev               |
| 4130                   |                         | <i>NOL6</i>   | 9   | 33468803                | gggaagattggagtttgg      | CATTGATGTCTGGTCGGATG   | 249              | 56°           | Fwd               |
| 5931                   |                         |               |     | 33470169                | tacctgagcgctgtgtgat     | ctgctactgggatgagagga   | 272              | 56°           | Fwd               |
| 4075, 5886             |                         | <i>FURIN</i>  | 15  | 90880107                | tgcacatcgacatcctcac     | caggacagagcaagcacCT    | 336              | 56°           | Fwd               |
| 4132, 5886             |                         | <i>PAK2</i>   | 3   | 196803031               | aaacctacactcaaagattgg   | AGCTCAGATATTTCTGCTTCA  | 249              | 56°           | Fwd               |
| 4132, 5463, 5886       |                         | <i>TMBIM4</i> | 12  | 66138156                | acttgccttgcccttttctg    | GGCTGATGGCAGCTAATACG   | 295              | 56°           | Rev               |

| Family           | Prioritization Workflow                       | Gene          | Chr | Variant Location (hg38) | Forward Primer            | Reverse Primer         | PCR product size | Optimized T <sub>m</sub> | Direction for seq |
|------------------|-----------------------------------------------|---------------|-----|-------------------------|---------------------------|------------------------|------------------|--------------------------|-------------------|
| 4093, 4130, 4132 | Previously reported Candidate Genes (n = 113) | <i>GLI3</i>   | 7   | 41964464                | GGTGACAAGCACAGTGGACA      | ttttcctaaagcCTATTGCAT  | 299              | 56°                      | Rev               |
| 4093             |                                               | <i>ZFHX4</i>  | 8   | 76856262                | ATTGAGATCCTGTCGGATGC      | ctgggccagtaaggactctg   | 286              | 56°                      | Fwd               |
| 4132             |                                               | <i>SCN9A</i>  | 2   | 166307016               | ggtaaaactgctgatattgatgtga | ccagagtctttcaagggtgcaa | 298              | 56°                      | Fwd               |
| 5886             |                                               |               |     | 166288642               | aaaatttgaaagtgagcaaagga   | TCAATGTTTGCCTGGTTCTG   | 450              | 56°                      | Rev               |
| 4132             |                                               | <i>FLNB</i>   | 3   | 58159621                | caccacagttttggtagg        | ctcccttgggacacacatt    | 298              | 56°                      | Rev               |
| 4132             |                                               | <i>GRIN2B</i> | 12  | 13611737                | aacctgagcactgctttt        | cacctgagggttcctttca    | 283              | 56°                      | Fwd               |
| 4132             |                                               | <i>GRIN2A</i> | 16  | 9763667                 | GGATGGGGAACCTCTATGAC      | TTTTCCCGAGAGTTTGCTT    | 297              | 56°                      | Rev               |
| 4379             |                                               | <i>FAT3</i>   | 11  | 92354793                | CTTGAAAGTTCAGGCATTGG      | GCTACTGGGAATGAAAGCTG   | 300              | 56°                      | Rev               |
| 5463             |                                               | <i>COL4A2</i> | 13  | 110491254               | gcctctctccattcctgaag      | tgttgaccgcctttgttctg   | 300              | 56°                      | Fwd               |
| 5463             |                                               | <i>KMT2D</i>  | 12  | 49034911                | tggtcctaattcagtggtctt     | aaagttggaagcaaagagacg  | 370              | 56°                      | Fwd               |
| 5886             |                                               | <i>CHRNA3</i> | 15  | 78601954                | CGGTTCTGGTCCTACGATA       | ATGCACAGGGTCACCTTCTC   | 300              | 56°                      | Rev               |
| 4130, 4132       |                                               | <i>NOP9</i>   | 14  | 24300643                | GTTGGGATTCACTCCCTTGA      | AGAGTTCTGACCACGAAGCTG  | 291              | 56°                      | Fwd               |

Note. \*primer pair used to initially amplify genomic region, ^primer pair used internally to amplify prioritized variant



**Table S7.***Number of Rare Variants: Familywise Filtering Workflow 1.*

|                                                                                                                                         | 4093                | 4130                | 4132                | 4075                | 4379                | 5463                | 5886                                                               | 5931                |
|-----------------------------------------------------------------------------------------------------------------------------------------|---------------------|---------------------|---------------------|---------------------|---------------------|---------------------|--------------------------------------------------------------------|---------------------|
| Total number of variants                                                                                                                | 21,592              | 12,752              | 47,401              | 31,785              | 30,607              | 27,345              | 34,292                                                             | 34,714              |
| Keep: exonic, splicing, exonic; splicing                                                                                                | 6,722               | 6,360               | 14,381              | 8,146               | 7,639               | 6,979               | 7,050                                                              | 18,157              |
| Remove: synonymous                                                                                                                      | 4,435               | 4,002               | 9,115               | 5,263               | 5,117               | 4,639               | 4,689                                                              | 10,180              |
| Remove: segmentally duplicated                                                                                                          | 3,069               | 2,526               | 6,841               | 3,512               | 3,538               | 3,283               | 3,177                                                              | 7,701               |
| Keep: gnomAD subpop <sup>1</sup> MAF < 0.01                                                                                             | 2,134 <sup>1a</sup> | 1,452 <sup>1a</sup> | 4,634 <sup>1a</sup> | 2,045 <sup>1a</sup> | 2,670 <sup>1a</sup> | 2,333 <sup>1a</sup> | 2,139 <sup>1a</sup>                                                | 3,749 <sup>1b</sup> |
| Keep: variants shared by 2+ individuals with TEGI phenotype                                                                             | 428                 | 229                 | 688                 | 361                 | 226                 | 217                 | 515                                                                | 102                 |
| Keep: CADD pred score ≥ 20                                                                                                              | 254                 | 189                 | 423                 | 218                 | 125                 | 187                 | 297                                                                | 67                  |
| Keep: positive GERP score                                                                                                               | 245                 | 108                 | 411                 | 215                 | 123                 | 185                 | 292                                                                | 65                  |
| Remove: bioinformatic prediction score sums <sup>3</sup><br>= 0/5, 1/5, 0/4, 1/4, 0/3                                                   | 209                 | 105                 | 346                 | 172                 | 102                 | 150                 | 234                                                                | 50                  |
| Apply: family-specific criteria <sup>2</sup><br>(# of unique genes)<br>= 'family-specific variant comparison lists'                     | 111 (101)           | 80 (72)             | 110 (99)            | 169 (152)           | 48 (37)             | 97 (85)             | 208 (192)                                                          | 18 (18)             |
| Total number of shared genes (4+ individuals affected on TEGI measure across at least 2 families have a variant on a gene) = 55         |                     |                     |                     |                     |                     |                     |                                                                    |                     |
| 3 genes on X chr ( <i>RBMX</i> , <i>RPL10</i> , <i>MAGEC1</i> )                                                                         |                     |                     |                     |                     |                     |                     |                                                                    |                     |
| 2 genes – variants have low quality and previous attempts to confirm for other projects was unsuccessful ( <i>AK2</i> , <i>PABPC1</i> ) |                     |                     |                     |                     |                     |                     |                                                                    |                     |
| 1 gene is so physically large it is more likely to have mutations, regardless of phenotype ( <i>TTN</i> )                               |                     |                     |                     |                     |                     |                     |                                                                    |                     |
| 2 genes from gene families that commonly show up in filtered WES output, regardless of phenotype ( <i>MUC3A</i> , <i>ANKLE1</i> )       |                     |                     |                     |                     |                     |                     |                                                                    |                     |
|                                                                                                                                         |                     |                     |                     |                     |                     |                     | <b>47 genes of interest remain</b><br>(listed in full in Table S8) |                     |
| Apply: family-specific co-segregation criteria <sup>4</sup><br>= 'co-segregating variant lists'<br>(listed in full in Tables A 2 – A 9) | 18                  | 31                  | 31                  | 37                  | 17                  | 6                   | 23                                                                 | 18                  |
| Genes from cross-referenced list <sup>2</sup>                                                                                           | 1                   | 6                   | 5                   | 5                   | 4                   | 0                   | 5                                                                  | 2                   |
| Total variants on genes from cross-referenced list 28                                                                                   |                     |                     |                     |                     |                     |                     |                                                                    |                     |
| Total unique variants on genes from cross-referenced list 25                                                                            |                     |                     |                     |                     |                     |                     |                                                                    |                     |
| <b>23 genes of interest remain (Table S9)</b>                                                                                           |                     |                     |                     |                     |                     |                     |                                                                    |                     |

**Note.** MAF = minor allele frequency; GERP = Genomic Evolutionary Rate Profiling; CADD = Combined Annotation Dependent Depletion; <sup>1a</sup>Subpop = non-Finnish European, <sup>1b</sup>Subpop = African, <sup>2</sup>Detailed in Table 6, <sup>3</sup>Prediction score sum includes = SIFT, PolyPhen-2, Mutation assessor, PROVEAN, MutationTaster2, <sup>4</sup>Detailed in Table 7

**Table S8.***47 Genes Resulting from Cross-Referencing of 'Family-Specific Variant Comparison Lists'.*

| Family |                       |       |       |       |       |      |       |       |      |                          |
|--------|-----------------------|-------|-------|-------|-------|------|-------|-------|------|--------------------------|
| Chr    | Gene                  | 4093  | 4130  | 4132  | 4075  | 4379 | 5463  | 5886  | 5931 | Notes                    |
| 5      | <i>ABLIM3</i>         | X     |       |       |       |      | X     |       |      | Only on Comparison Lists |
| 8      | <i>ADAM28</i>         |       |       |       |       |      |       | X     |      | Only on Comparison Lists |
| 16     | <i>ADCY7</i>          | X     |       |       |       |      | X     |       |      | Only on Comparison Lists |
| 5      | <i>AP3S1</i>          | X     |       |       | X     |      |       |       |      | Only on Comparison Lists |
| 17     | <i>BAHCC1</i>         | X     |       |       |       |      |       |       | X*   |                          |
| 19     | <i>BICRA</i>          |       |       |       |       | X*   | X     | X     |      |                          |
| 20     | <i>BPIFB4</i>         | X     |       | X     |       |      |       |       |      | Only on Comparison Lists |
| 12     | <i>DNAH10</i>         |       |       |       |       |      | X     | X     |      | Only on Comparison Lists |
| 2      | <i>DYSF</i>           |       |       |       |       |      | X     | X     |      | Only on Comparison Lists |
| 6      | <b><i>FGD2</i></b>    |       |       | X     | X     |      |       |       |      |                          |
| 15     | <i>FURIN</i>          |       |       |       | X*    |      |       | X     |      | Only on Comparison Lists |
| 8      | <i>GPT</i>            | X     |       |       |       |      |       | X*    |      |                          |
| 2      | <i>HS6ST1</i>         | X     | X*    |       | X*    |      |       |       |      |                          |
| 1      | <i>IQGAP3</i>         | X     |       |       |       |      |       | X*    |      |                          |
| 1      | <i>KIAA0040</i>       | X     | X     |       | X     |      | X     |       |      | Only on Comparison Lists |
| 4      | <i>LARP7</i>          | X     |       |       |       |      | X     |       |      | Only on Comparison Lists |
| 17     | <i>MYO15B</i>         | X     |       | X*    | X     |      |       |       |      |                          |
| 6      | <i>MYO6</i>           |       |       | X     |       | X*   | X     |       |      |                          |
| 2      | <i>NEB</i>            |       |       |       | X     |      | X     |       |      | Only on Comparison Lists |
| 2      | <i>NMI</i>            |       |       |       |       | X    | X     |       |      | Only on Comparison Lists |
| 16     | <i>NOD2</i>           | X     |       |       |       |      |       | X     |      | Only on Comparison Lists |
| 9      | <i>NOL6</i>           |       | X*    |       |       |      |       |       | X*   |                          |
| 2      | <i>OTOF</i>           |       |       | X     |       |      | X     |       |      | Only on Comparison Lists |
| 3      | <i>PAK2</i>           |       |       | X*    |       |      |       | X     |      |                          |
| 5      | <i>PCDH12</i>         | X*    |       |       |       |      |       | X*    |      |                          |
| 5      | <i>PCDHB3</i>         | X     | X*    |       |       |      |       |       |      |                          |
| 20     | <i>PCK1</i>           |       | X*    |       | X     |      |       |       |      |                          |
| 4      | <i>PDHA2</i>          |       |       |       |       |      | X     | X*    |      |                          |
| 21     | <i>PFKL</i>           | X     |       |       | X*    |      |       |       |      |                          |
| 19     | <i>PLEKHG2</i>        |       | X     |       |       | X    |       |       |      | Only on Comparison Lists |
| 19     | <i>PLIN4</i>          |       |       | X*    | X     |      |       |       |      |                          |
| 15     | <i>POLG</i>           |       |       | X     |       |      | X     |       |      | Only on Comparison Lists |
| 13     | <i>RBM26</i>          | X     |       | X*    |       |      |       |       |      |                          |
| 13     | <i>SKA3</i>           |       |       |       | X     |      | X     |       |      | Only on Comparison Lists |
| 6      | <b><i>SLC17A4</i></b> |       |       | X     |       |      |       | X     |      | Only on Comparison Lists |
| 5      | <i>SRA1</i>           |       | X*    |       | X     |      |       |       |      |                          |
| 17     | <i>SREBF1</i>         |       |       |       | X     |      |       | X     |      | Only on Comparison Lists |
| 1      | <i>SYCP1</i>          |       |       | X     | X*    | X*   |       | X     |      |                          |
| 6      | <i>TBP</i>            | X     | X*    |       | X     |      |       | X*    |      |                          |
| 12     | <i>TDG</i>            | X     |       |       |       |      |       | X     |      | Only on Comparison Lists |
| 12     | <i>TMBIM4</i>         |       |       | X*    |       |      | X     | X     |      |                          |
| 15     | <i>TYRO3</i>          |       |       |       | X     |      | X     |       |      | Only on Comparison Lists |
| 1      | <i>UBXN11</i>         |       | X     |       | X     |      |       |       |      | Only on Comparison Lists |
| 10     | <i>UNC5B</i>          |       | X     |       |       |      | X     |       |      | Only on Comparison Lists |
| 7      | <i>ZMIZ2</i>          | X     |       |       |       |      |       | X     |      | Only on Comparison Lists |
| 19     | <i>ZNF226</i>         |       | X     |       |       | X*   |       |       |      |                          |
| 19     | <i>ZNF738</i>         |       |       |       | X*    |      |       | X     |      |                          |
| Total  |                       | 19(1) | 11(6) | 12(5) | 18(5) | 6(4) | 17(0) | 19(5) | 2(2) |                          |

Note. \*on co-segregating variant list, total number of variants on co-segregating variant list in parentheses; 'Only on Comparison List' refers to variants not on the co-segregating variant list and not prioritized for confirmation, variants in bolded genes were prioritized because they are within the chr6 region previously linked to the TEGI (Rice, Smith, et al., 2009; Table S14a-S14e)

**Table S9.**

Summary of 44 Variants on 23 Genes Prioritized from Filtering Workflow 1 Cross-referenced List.

| Chr                                                                                                        | Unique Genes | # of var | rsID/<br>chromosomal location (hg38) | c.DNA                                                                                                                                              | AA change                    | Variants in Family: |              |
|------------------------------------------------------------------------------------------------------------|--------------|----------|--------------------------------------|----------------------------------------------------------------------------------------------------------------------------------------------------|------------------------------|---------------------|--------------|
|                                                                                                            |              |          |                                      |                                                                                                                                                    |                              | Strict Lists        | Compare List |
| Confirmed                                                                                                  |              |          |                                      |                                                                                                                                                    |                              |                     |              |
| 1                                                                                                          | IQGAP3       | 2        | rs112144116<br>rs147754283           | c.1684G>A<br>c.1888C>T                                                                                                                             | p.Ala562Thr<br>p.Arg630Trp   | 5886                | 4093         |
| 4                                                                                                          | PDHA2        | 1        | rs147966234                          | c.857G>C                                                                                                                                           | p.Arg286Pro                  | 5886                | 5463         |
| 5                                                                                                          | PCDHB3       | 1        | rs147754283                          | c.242C>T                                                                                                                                           | p.Thr81Ile                   | 4130                | 4093         |
| 6                                                                                                          | MYO6         | 3        | rs551348450                          | c.2743dupA                                                                                                                                         | p.Gln918Thrfs*24             | 4379                |              |
|                                                                                                            |              |          | chr6:75,857,098                      | c.1225G>A                                                                                                                                          | p.Val409Ile                  | 4132                |              |
|                                                                                                            |              |          | rs573770611                          | c.271G>A                                                                                                                                           | p.Ala91Thr                   |                     | 5463         |
| 9                                                                                                          | NOL6         | 2        | rs114465306<br>rs114110943           | c.401C>T<br>c.1096C>T                                                                                                                              | p.Pro134Leu<br>p.His366Tyr   | 4130<br>5931        |              |
| 15                                                                                                         | FURIN        | 1        | rs150925934                          | c.1390C>T                                                                                                                                          | p.Arg462Trp                  | 4075                | 5886         |
| 17                                                                                                         | BAHCC1       | 2        | rs200719992<br>rs369588790           | c.7294C>G<br>c.732G>A                                                                                                                              | p.Gln2463Glu<br>p.Arg2199Gln | 5931                | 4093         |
| 17                                                                                                         | MYO15B       | 4        | rs139077523                          | c.1615C>T                                                                                                                                          | p.Pro539Ser                  | 4132                |              |
|                                                                                                            |              |          | chr17:75,625,226                     | c.8678A>C                                                                                                                                          | p.Asn2893Thr                 |                     | 4093         |
|                                                                                                            |              |          | rs202034551                          | c.7726G>C                                                                                                                                          | p.Ala2576Pro                 |                     | 4075         |
|                                                                                                            |              |          | chr17:75,619,800                     | c.7187+1G>A                                                                                                                                        | splicing                     |                     | 4075         |
| 19                                                                                                         | ZNF226       | 1        | rs200990346                          | c.1036C>T                                                                                                                                          | p.Arg346Cys                  | 4379                | 4130         |
| Indel in everyone                                                                                          |              |          |                                      |                                                                                                                                                    |                              |                     |              |
| 1                                                                                                          | SYCP1        | 1        | chr1:114,994,979                     | c.2892dupA                                                                                                                                         | p.Leu968Thrfs*5              | 4075, 4379          | 4132, 5886   |
| 6                                                                                                          | MYO6         | 3        | rs551348450                          | c.2743dupA                                                                                                                                         | p.Gln918Thrfs*24             | 4379                |              |
| 12                                                                                                         | TMBIM4       | 1        | chr12:66,138,156                     | c.520dupT                                                                                                                                          | p.Tyr174Leufs*2              | 4132                | 5463, 5886   |
| Confirmed a different number of repeats in Sanger sequencing than called in exome data in most individuals |              |          |                                      |                                                                                                                                                    |                              |                     |              |
| 5                                                                                                          | PCDH12       | 1        | chr5:141,945,390                     | c.3545_3546<br>insCAGCAG                                                                                                                           | p.Ser1181_Arg1182 insSS      | 4093, 5886          |              |
| NOT Confirmed                                                                                              |              |          |                                      |                                                                                                                                                    |                              |                     |              |
| 2                                                                                                          | HS6ST1       | 2        | rs199993343<br>chr2:128,318,170      | c.T341G<br>c.C394G                                                                                                                                 | p.Val114Gly<br>p.Arg132Gly   | 4130, 4075          | 4093         |
| 3                                                                                                          | PAK2         | 1        | rs201465227                          | c.G303C                                                                                                                                            | p.Gln101His                  | 4132                | 5886         |
| 13                                                                                                         | RBM26        | 1        | chr13:79,344,671                     | c.2100dupA                                                                                                                                         | p.Q701Tfs*23                 | 4132                | 4093         |
| Primers could Not be Optimized                                                                             |              |          |                                      |                                                                                                                                                    |                              |                     |              |
| 8                                                                                                          | GPT          | 2        | chr8:144,506,908<br>chr8:144,506,631 | c.C1262A<br>c.1401-2A>C                                                                                                                            | p.Pro421His<br>splicing      | 5886                | 4093         |
| 17                                                                                                         | MYO15B       | 4        | rs202034551                          | c.7726G>C                                                                                                                                          | p.Ala2576Pro                 |                     | 4075         |
| No primers designed – due to reported protein expression                                                   |              |          |                                      |                                                                                                                                                    |                              |                     |              |
| 5                                                                                                          | SRA1         | 2        | rs148259347<br>rs35610885            | Steroid receptor, associated with cancer growth (e.g., (Lin et al., 2017)                                                                          |                              | 4130                | 4075         |
| 6                                                                                                          | TBP          | 5        | chr6:170561952-76                    | ALT = 0*                                                                                                                                           |                              | 4130, 5886          | 4093, 4075   |
| 19                                                                                                         | BICRA        | 4        | chr19:47695363-65                    | ALT = 0*                                                                                                                                           |                              | 4379                | 5463, 5886   |
| 19                                                                                                         | ZNF738       | 1        | chr19:21,383,393                     | ALT = 0*                                                                                                                                           |                              | 4075                | 5886         |
| 19                                                                                                         | PLIN4        | 2        | chr19:4,512,672<br>chr19:4,511,759   | Lipid droplets & misc. non-brain diseases (e.g. (Gasparin et al., 2018); additional references)                                                    |                              | 4132                | 4075         |
| 19                                                                                                         | PFKL         | 2        | rs61737076<br>rs118106526            | Part of a cluster of intestine & liver – lipid metabolism genes^, SNP associated with hemoglobin A1c level (Barton et al., 2021; Lee et al., 2022) |                              | 4075                | 4093         |
| 20                                                                                                         | PCK1         | 2        | rs41302559<br>rs367998997            | Part of a cluster of liver – oxidoreductase activity^, Gene associated with non-brain diseases (Beale et al., 2007; Xiang et al., 2022)            |                              | 4130                | 4075         |

Note. AA = amino acid; light grey = not followed up in families, \*0 called as alternate allele by GATK (Genome Analysis Toolkit), ^according to The Human Protein Atlas (proteintlas.org)

**Table S10.***Summary of Prioritized Variants from Filtering Workflow 1 Sequenced and Confirmed in Family Members.*

|                                                                             | rsID/<br>chromosomal location<br>(hg38) | Family | TEGI Affected   |                    |                                          |
|-----------------------------------------------------------------------------|-----------------------------------------|--------|-----------------|--------------------|------------------------------------------|
| Gene                                                                        |                                         |        | with<br>variant | Total in<br>family | Confirmation Note                        |
| Sequenced in Additional Probands                                            |                                         |        |                 |                    |                                          |
| IQGAP3                                                                      | rs112144116                             | 5886   | 4               | 4                  | -from omnibus AFF dad                    |
|                                                                             | rs147754283                             | 4093   | 2               | 4                  |                                          |
|                                                                             |                                         | 5886   | 4               | 4                  |                                          |
| PDHA2                                                                       | rs147966234                             |        |                 |                    | -from omnibus AFF dad                    |
|                                                                             |                                         | 5463   | 2               | 3                  | -not in either TEGI unaffected sibling   |
| PCDHB3                                                                      | rs147754283                             | 4130   | 2               | 2                  | -from omnibus AFF mom                    |
|                                                                             |                                         | 4093   | 3               | 4                  |                                          |
| NOL6                                                                        | rs114465306                             | 4130   | 2               | 2                  | -from omnibus AFF mom                    |
|                                                                             | rs114110943                             | 5931   | 2               | 2                  | -carried by 2 siblings–1 TEGI unaffected |
| BAHCC1                                                                      | rs200719992                             | 5931   | 2               | 2                  | -carried by 2 siblings–1 TEGI unaffected |
|                                                                             | rs369588790                             | 4093   | 3               | 4                  |                                          |
| Confirmed but not co-segregating and NOT selected for additional sequencing |                                         |        |                 |                    |                                          |
| MYO6                                                                        | chr6:75,857,098                         | 4132   | 1               | 6                  |                                          |
|                                                                             | rs573770611                             | 5463   | 2               | 3                  | -from omnibus UNaff mom                  |
| FURIN                                                                       | rs150925934                             | 4075   | 3               | 4                  | -from omnibus UNaff mom                  |
|                                                                             |                                         | 5886   | 2               | 4                  | -in AFF twins, from omnibus AFF dad      |
|                                                                             | rs139077523                             | 4132   | 3               | 6                  | -branch 2 only                           |
| MYO15B                                                                      | chr17:75,625,226                        | 4093   | 2               | 4                  |                                          |
|                                                                             | chr17:75,619,800                        | 4075   | 2               | 4                  |                                          |
| ZNF226                                                                      | rs200990346                             | 4379   | 1               | 3                  | -from omnibus UNaff dad                  |
|                                                                             |                                         | 4130   | 2               | 2                  | -NOT from omnibus AFF mom (dad NA)       |

*Note.* Confirmation notes include additional notes when relevant; such as when the variant is inherited from a parent affected on a standardized omnibus language measure or when a sibling who is unaffected on the TEGI carries or does not carry the variant; AFF = affected; UNaff = unaffected; NA = not available

**Table S11a.***18 Rare Variants Prioritized in Family 4093 Shared by All Four Family Members Affected on the TEGI.*

| Gene            | Chr | Genomic         |             | Notes                 |
|-----------------|-----|-----------------|-------------|-----------------------|
|                 |     | Position (hg38) | rsID        |                       |
| <i>ARHGEF17</i> | 11  | 73360507        | rs2298808   |                       |
| <i>ATP2A3</i>   | 17  | 3937503         | rs140980200 |                       |
| <i>FLT4</i>     | 5   | 180621641       | rs55667289  |                       |
| <i>GLYATL3</i>  | 6   | 49512028        | rs560399915 |                       |
| <i>MAGEC1</i>   | X   | 141906119       | -           | On ChrX               |
| <i>MAGEC1</i>   | X   | 141906127       | -           | On ChrX               |
| <i>MPDZ</i>     | 9   | 141906119       | -           |                       |
| <i>NFATC4</i>   | 14  | 141906127       | -           |                       |
| <i>PABPC1</i>   | 8   | 100706893       | rs79986761  | Low quality genotypes |
| <i>*PCDH12</i>  | 5   | 13136784        | rs200891478 | Same variant in 5886  |
| <i>PDE3A</i>    | 12  | 24373757        | rs142749204 |                       |
| <i>PLA2G3</i>   | 22  | 100706893       | rs79986761  |                       |
| <i>PRDX5</i>    | 11  | 141945390       | -           |                       |
| <i>RELN</i>     | 7   | 20616336        | rs141325069 |                       |
| <i>RSAD2</i>    | 2   | 31140148        | rs573436695 |                       |
| <i>TTC14</i>    | 3   | 64319797        | rs77269065  |                       |
| <i>VEPH1</i>    | 3   | 103700962       | rs149397714 |                       |
| <i>CCHC24</i>   | 10  | 6887075         | rs140690041 |                       |

*Note.* \*variant prioritized for confirmation in the family members (located within one of the 23 genes of interest)

**Table S11b.***31 Rare Variants Prioritized in Family 4130 Shared by Both Family Members Affected on the TEGI.*

| Gene                     | Chr | Genomic         |             | Notes                                       |
|--------------------------|-----|-----------------|-------------|---------------------------------------------|
|                          |     | Position (hg38) | rsID        |                                             |
| <i>ADGRL2</i>            | 1   | 81990423        | rs72719419  |                                             |
| <i>AIPL1</i>             | 17  | 6425644         | rs150427474 |                                             |
| <i>C9orf85</i>           | 9   | 71947067        | rs142178034 |                                             |
| <i>CDC7</i>              | 1   | 91511686        | -           |                                             |
| <i>CORO2A</i>            | 9   | 98157552        | rs61741701  |                                             |
| <i>DGKQ</i>              | 4   | 967972          | rs113007498 |                                             |
| <i>DIO1</i>              | 1   | 53894353        | rs375309412 |                                             |
| <i>DSPP</i>              | 4   | 87615746-55     | -           |                                             |
| <i>DSPP</i>              | 4   | 87615758-67     | -           |                                             |
| <i>FERMT3</i>            | 11  | 64207494        | rs149000560 |                                             |
| <i>*HS6ST1</i>           | 2   | 128318223       | rs199993343 | Same variant in 4075, Diff. variant in 4093 |
| <i>IK</i>                | 5   | 140658953       | rs34433858  |                                             |
| <i>METTL17</i>           | 14  | 20992611        | rs72661115  |                                             |
| <i>MPO</i>               | 17  | 58270865        | rs35897051  |                                             |
| <i>MPPED2</i>            | 11  | 30411583        | -           |                                             |
| <i>*NOL6</i>             | 9   | 33470169        | -           | Different variant in 5931                   |
| <i>PCDHB16</i>           | 5   | 141183583       | rs61742261  |                                             |
| <i>*PCDHB3</i>           | 5   | 141100891       | rs61739886  |                                             |
| <i>PCF11</i>             | 11  | 83168721        | -           |                                             |
| <i>PCK1</i> <sup>^</sup> | 20  | 57565383        | rs41302559  | Different variant in 4075                   |
| <i>PECR</i>              | 2   | 216081740       | rs144581659 |                                             |
| <i>RPL10</i>             | X   | 154400837       | -           | On ChrX                                     |
| <i>SCN1A</i>             | 2   | 166045080       | rs121918817 |                                             |
| <i>SEMG2</i>             | 20  | 45222191        | rs138018319 |                                             |
| <i>SRA1</i> <sup>^</sup> | 5   | 140552106       | rs148259347 | Different variant in 4075                   |
| <i>SULT1C3</i>           | 2   | 108259015       | -           |                                             |
| <i>TBP</i> <sup>^</sup>  | 6   | 170561952       | -           | Different variants in 4093. 4075. 5886      |
| <i>TBX6</i>              | 16  | 30088596        | -           |                                             |
| <i>UBE3A</i>             | 15  | 25408686        | -           |                                             |
| <i>ZKSCAN7</i>           | 3   | 44570999        | rs373307729 |                                             |
| <i>ZNF207</i>            | 17  | 32360964        | -           |                                             |

Note. \*variant prioritized for confirmation in the family members (located within one of the 23 genes of interest),

<sup>^</sup>variant located within one of the 23 genes of interest, but it was not ultimately prioritized for sequencing confirmation in the family members because it was likely a CNV or additional expression information excluded it

**Table S11c.**

*31 Rare Variants Prioritized in Family 4132 Shared by Two or More Family Members from Different Branches Affected on the TEGI.*

| Gene             | Chr | Genomic Position (hg38) | rsID        | Notes                                              |
|------------------|-----|-------------------------|-------------|----------------------------------------------------|
| <i>ABHD18#</i>   | 4   | 128011984               | -           |                                                    |
| <i>ART1</i>      | 11  | 3660253                 | rs150574054 |                                                    |
| <i>ATN1</i>      | 12  | 6936737                 | -           |                                                    |
| <i>BODIL1</i>    | 4   | 13614505                | rs144761044 |                                                    |
| <i>C10orf67#</i> | 10  | 23239770                | rs111911206 |                                                    |
| <i>DEPDC1</i>    | 1   | 68496977                | rs144782062 |                                                    |
| <i>G2E3</i>      | 14  | 30605565                | -           |                                                    |
| <i>GP1BA</i>     | 17  | 4933948                 | -           |                                                    |
| <i>GRIN2B#</i>   | 12  | 13611737                | rs145021339 | Candidate gene variant                             |
| <i>KCNE2</i>     | 21  | 34370500                | rs2234916   |                                                    |
| <i>LRRN4</i>     | 20  | 6041600                 | rs145844426 |                                                    |
| <i>MUC2#</i>     | 11  | 1095060                 | -           | False positive                                     |
| <i>*MYO15B#</i>  | 17  | 75589672                | rs139077523 | Different variant in 4093                          |
| <i>NUMA1</i>     | 11  | 72010801                | -           |                                                    |
| <i>PABPC1</i>    | 8   | 100709481               | rs146200489 | Confirmation was unsuccessful in previous projects |
| <i>PABPC1</i>    | 8   | 100709671               | rs142985461 | Confirmation was unsuccessful in previous projects |
| <i>PABPC1</i>    | 8   | 100709464               | -           | Confirmation was unsuccessful in previous projects |
| <i>PADI2</i>     | 1   | 17069250                | rs139624393 |                                                    |
| <i>*PAK2</i>     | 3   | 196803031               | rs201465227 | Same variant in 5886                               |
| <i>PLIN4^</i>    | 19  | 4512672                 | -           | Different variant in 4075                          |
| <i>POLRMT</i>    | 19  | 632849                  | rs139758373 |                                                    |
| <i>*RBM26</i>    | 13  | 79344671                | -           | Different variant in 4093                          |
| <i>ROPN1L</i>    | 5   | 10450114                | -           |                                                    |
| <i>SLAIN1#</i>   | 13  | 77746666                | rs144139933 |                                                    |
| <i>SLC26A5</i>   | 7   | 103421378               | rs141952919 |                                                    |
| <i>SOX30</i>     | 5   | 157626561               | rs139465019 |                                                    |
| <i>SSI8</i>      | 18  | 26035040                | rs147146752 |                                                    |
| <i>*TMBIM4</i>   | 12  | 66138156                | -           | Same variant in 5463, 5886                         |
| <i>TTK</i>       | 6   | 80007992                | -           |                                                    |
| <i>TUBGCP3</i>   | 13  | 112547552-57            | -           |                                                    |
| <i>XDH</i>       | 2   | 31366019                | rs140007233 |                                                    |

*Note.* \*variant prioritized for confirmation in the family members (located within one of the 23 genes of interest),

^variant located within one of the 23 genes of interest, but it was not ultimately prioritized for sequencing confirmation in the family members because it was likely a CNV or additional expression information excluded it, #variants were only called in two individuals affected on the TEGI, but genotypes were missing for affected members of the other branch, so the variant remained on the final prioritized list because the variants could be present in additional family members

**Table S11d.**

37 Rare Variants Prioritized in Family 4075 Shared by Three or More of the Four Family Members Affected on the TEGI.

| Gene                       | Chr | Genomic Position (hg38) | rsID        | Notes                                       |
|----------------------------|-----|-------------------------|-------------|---------------------------------------------|
| <i>BRD4</i>                | 19  | 15273009                | -           |                                             |
| <i>CAPS</i>                | 19  | 5915231                 | rs201449236 |                                             |
| <i>CLEC4G</i>              | 19  | 7730164                 | -           |                                             |
| <i>CNTN5</i>               | 11  | 100061213               | rs201910584 |                                             |
| <i>COL3A1</i>              | 2   | 188997207               | rs35795890  |                                             |
| <i>DDI1</i>                | 11  | 104036976               | rs375454517 |                                             |
| <i>DNAH1</i>               | 3   | 52350578                | rs61734644  |                                             |
| <i>DNAH5</i>               | 5   | 13844842                | rs116524991 |                                             |
| <i>DNHD1</i>               | 11  | 6564423                 | rs552630821 |                                             |
| <i>ELF2</i>                | 4   | 139072021               | rs17322140  |                                             |
| <i>FAM149A</i>             | 4   | 186167245               | rs111681837 |                                             |
| <i>*FURIN</i>              | 15  | 90880107                | rs150925934 | Same variant in 5886                        |
| <i>GAS8</i>                | 16  | 90031453                | rs884928    |                                             |
| <i>*HS6ST1</i>             | 2   | 128318223               | rs199993343 | Same variant in 4130, Diff. variant in 4093 |
| <i>HSD17B4</i>             | 5   | 119531311               | rs201560431 |                                             |
| <i>ITIH2</i>               | 10  | 7723566                 | rs76140242  |                                             |
| <i>KDM1B</i>               | 6   | 18197590                | rs138145635 |                                             |
| <i>MAP2K1</i>              | 15  | 66436777                | -           |                                             |
| <i>MCM9</i>                | 6   | 118913414               | rs78231991  |                                             |
| <i>MED4</i>                | 13  | 48090420                | -           |                                             |
| <i>NDUFAF6</i>             | 8   | 95035578                | -           |                                             |
| <i>NELL2</i>               | 12  | 44665527                | rs138454729 |                                             |
| <i>NPHS1</i>               | 19  | 35842196                | rs143986233 |                                             |
| <i>OLAH</i>                | 10  | 15071877                | rs141112464 |                                             |
| <i>PCDHA3</i>              | 5   | 140803137               | rs149374718 |                                             |
| <i>PCDHGB2</i>             | 5   | 141361373               | -           |                                             |
| <i>PFKL</i> <sup>^</sup>   | 21  | 44314011                | rs61737076  | Different variant in 4093                   |
| <i>PRODH2</i>              | 19  | 35806769                | rs148996461 | On ChrX                                     |
| <i>RBMX</i>                | X   | 136877987               | -           | On ChrX                                     |
| <i>RBMX</i>                | X   | 136877960               | rs76812369  | On ChrX                                     |
| <i>RPL10</i>               | X   | 154400837               | -           |                                             |
| <i>*SYCP1</i>              | 1   | 114994979               | -           | Same variant in 4132, 4379, 5463            |
| <i>TRIM56</i>              | 7   | 101089563               | rs148309415 |                                             |
| <i>UNC13B</i>              | 9   | 35231126                | rs200386049 |                                             |
| <i>UNC13B</i>              | 9   | 35403557                | rs201643678 |                                             |
| <i>ZBTB25</i>              | 14  | 64487702                | rs142592421 |                                             |
| <i>ZNF738</i> <sup>^</sup> | 19  | 21383393                | -           | Same variant in 5586                        |

Note. \*variant prioritized for confirmation in the families (located within one of the 23 genes of interest), ^variant located within one of the 23 genes of interest, but it was not ultimately prioritized for sequencing confirmation in the family members because it was likely a CNV or additional expression information excluded it



**Table S11e.**

17 Rare Variants Prioritized in Family 4379 Shared by Two or More of the Three Family Members Affected on the TEGI.

| Gene               | Chr | Genomic Position (hg38) | rsID        | Notes                            |
|--------------------|-----|-------------------------|-------------|----------------------------------|
| BICRA <sup>^</sup> | 19  | 47695363-64             | -           | Different variant in 5463, 5586  |
| BICRA <sup>^</sup> | 19  | 47695363                | -           | Same variant in 5463, 5586       |
| BICRA <sup>^</sup> | 19  | 47695364                | -           | Same variant in 5463, 5586       |
| BICRA <sup>^</sup> | 19  | 47695365                | -           | Same variant in 5886             |
| CD37               | 19  | 49336960                | -           |                                  |
| CSMD2              | 1   | 33714622                | -           |                                  |
| EFCAB13            | 17  | 47361523-26             | -           |                                  |
| EFCAB13            | 17  | 47361521-22             | -           |                                  |
| MTTP               | 4   | 99594765                | -           |                                  |
| *MYO6              | 6   | 75890140                | rs551348450 | Different variant in 4075, 5463  |
| PABPC1             | 8   | 100709499               | rs139094790 |                                  |
| RSPH6A             | 19  | 45795909                | -           |                                  |
| *SYCP1             | 1   | 114994979               | -           | Same variant in 4132, 4075, 5886 |
| TMEM143            | 19  | 48342687                | rs138056528 |                                  |
| UNC13A             | 19  | 17639084                | rs200328448 |                                  |
| WFIKK2             | 17  | 50839994                | rs191998613 |                                  |
| *ZNF226            | 19  | 44176298                | rs200990346 | Same variant in 4130             |

Note. \*variant prioritized for confirmation in the families (located within one of the 23 genes of interest), ^variant located within one of the 23 genes of interest, but it was not ultimately prioritized for sequencing confirmation in the family members because it was likely a CNV or additional expression information excluded it

**Table S11f.**

6 Rare Variants of Large Effect Prioritized in Family 5463 Shared by All Three of the Four Family Members Affected on the TEGI.

| Gene    | Chr | Genomic Position (hg38) | rsID        | Notes                                              |
|---------|-----|-------------------------|-------------|----------------------------------------------------|
| ALDH7A1 | 5   | 126545018               | rs61757684  |                                                    |
| CCDC136 | 7   | 128801438               | rs185493260 |                                                    |
| MADCAM1 | 19  | 501762                  | -           |                                                    |
| MADCAM1 | 19  | 501762                  | -           |                                                    |
| PABPC1  | 8   | 100709671               | rs142985461 | Confirmation was unsuccessful in previous projects |
| PABPC1  | 8   | 128801438               | rs185493260 | Confirmation was unsuccessful in previous projects |

**Table S11g.**

23 Rare Variants Prioritized in Family 5886 Shared by All Four of the Four Family Members Affected on the TEGI.

| Gene    | Chr | Genomic Position (hg38) | rsID        | Notes                     |
|---------|-----|-------------------------|-------------|---------------------------|
| ADAMTS6 | 5   | 65470971                | rs61736454  |                           |
| BUD13   | 11  | 116762900               | rs139478949 |                           |
| CBR4    | 4   | 168990307               | rs80133417  |                           |
| FAM13A  | 4   | 89056962                | -           |                           |
| GCAT    | 22  | 37815274                | rs150003624 |                           |
| GNAS    | 20  | 58854572                | -           |                           |
| *GPT    | 8   | 144506908               | -           | Different variant in 4093 |
| *IQGAP3 | 1   | 156551755               | rs112144116 | Different variant in 4093 |
| ITGA10  | 1   | 145897563               | rs116524970 |                           |
| KDM6B   | 17  | 7847264                 | -           |                           |
| MICU3   | 8   | 17105561                | rs143132509 |                           |
| NHLRC3  | 13  | 39047828                | rs149175958 |                           |
| NUP210L | 1   | 153995093               | rs199577888 |                           |

| Gene                   | Chr | Genomic Position (hg38) | rsID        | Notes                                                |
|------------------------|-----|-------------------------|-------------|------------------------------------------------------|
| <i>OPLAH</i>           | 8   | 144058364               | -           |                                                      |
| <i>*PCDH12</i>         | 5   | 141945390               | -           | Same variant in 4093                                 |
| <i>PDE9A</i>           | 21  | 42765388                | -           |                                                      |
| <i>*PDHA2</i>          | 4   | 95841007                | rs147966234 | Different variant in 5463                            |
| <i>PTGFRN</i>          | 1   | 116967102               | rs201491047 |                                                      |
| <i>RPRD2</i>           | 1   | 150471124               | rs201498425 |                                                      |
| <i>SH3RF2</i>          | 5   | 146049208               | -           |                                                      |
| <i>STAB1</i>           | 3   | 52520515                | rs147953260 |                                                      |
| <i>TBP<sup>^</sup></i> | 6   | 170561964               | -           | Same variant in 4130, 4075, Diff. variant(s) in 4130 |
| <i>UHRF1BP1L</i>       | 12  | 100058491               | -           |                                                      |

*Note.* \*variant prioritized for confirmation in the families (located within one of the 23 genes of interest), ^variant located within one of the 23 genes of interest, but it was not ultimately prioritized for sequencing confirmation in the family members because it was likely a CNV or additional expression information excluded it

**Table S11h.**

*18 Rare Variants Prioritized in Family 5931 Shared by Both Family Members Affected on the TEGI.*

| Gene            | Chr | Genomic Position (hg38) | rsID        | Notes                     |
|-----------------|-----|-------------------------|-------------|---------------------------|
| <i>ARHGAP31</i> | 3   | 119414288               | rs186621177 |                           |
| <i>ASPSCR1</i>  | 17  | 82010826                | rs202149445 |                           |
| <i>*BAHCC1</i>  | 17  | 81461957                | rs200719992 | Different variant in 4093 |
| <i>CCDC61</i>   | 19  | 46008163                | rs146892135 |                           |
| <i>COBLL1</i>   | 2   | 164743733               | -           |                           |
| <i>DHDH</i>     | 19  | 48942538                | rs140363616 |                           |
| <i>DTD2</i>     | 14  | 31457378                | rs17097904  |                           |
| <i>IFIH1</i>    | 2   | 162278246               | -           |                           |
| <i>IL15RA</i>   | 10  | 5966288                 | rs149532559 |                           |
| <i>*NOL6</i>    | 9   | 33468803                | rs114110943 | Different variant in 4130 |
| <i>PABPC1</i>   | 8   | 100709671               | rs142985461 |                           |
| <i>PER2</i>     | 2   | 238253082               | -           |                           |
| <i>PFKP</i>     | 10  | 3119938                 | rs41288721  |                           |
| <i>RBMX</i>     | X   | 136877987               | -           |                           |
| <i>RPL10</i>    | X   | 154400837               | -           |                           |
| <i>SDR42E1</i>  | 16  | 81999895                | rs201686460 |                           |
| <i>TKTL2</i>    | 4   | 163472321               | rs200478211 |                           |
| <i>TPM2</i>     | 9   | 35685296                | rs150120234 |                           |

*Note.* \*variant prioritized for confirmation in the families (located within one of the 23 genes of interest), ^variant located within one of the 23 genes of interest, but it was not ultimately prioritized for sequencing confirmation in the family members because it was likely a CNV or additional expression information excluded it

**Table S12.***Number of Candidate Gene Variants: Familywise Filtering Workflow 2b.*

|                                                                                       | 4093   | 4130  | 4132   | 4075   | 4379   | 5463   | 5886   | 5931   |
|---------------------------------------------------------------------------------------|--------|-------|--------|--------|--------|--------|--------|--------|
| Variants with gnomAD global MAF < 0.07, not synonymous and not segmentally duplicated | 12,041 | 5,084 | 28,643 | 18,543 | 18,410 | 16,425 | 21,331 | 29,008 |
| Variants on candidate genes in 1 individual affected on TEGI                          | 67     | 26    | 136    | 68     | 62     | 55     | 91     | 36     |
| Keep: exonic                                                                          | 16     | 12    | 46     | 24     | 13     | 17     | 24     | 18     |
| <u>shared by 2+ individuals with TEGI phenotype</u>                                   | 6      | 8     | 15     | 4      | 2      | 3      | 11     | 1      |
| Keep: CADD pred score $\geq 20$                                                       | 2      | 2     | 9      | 0      | 2      | 2      | 7      | 0      |
| Keep: positive GERP score                                                             | 2      | 2     | 8      | 0      | 2      | 2      | 7      | 0      |
| Remove: bioinformatic prediction score sums <sup>1</sup> = 0/5, 1/5, 0/4, 1/4, 0/3    | 2      | 2     | 7      | 0      | 1      | 2      | 4      | 0      |
| Total variants                                                                        |        |       |        |        |        |        |        | 18     |
| Total unique variants                                                                 |        |       |        |        |        |        |        | 14     |
| Total unique genes                                                                    |        |       |        |        |        |        |        | 13     |

*Note.* MAF = minor allele frequency; GERP = Genomic Evolutionary Rate Profiling; CADD = Combined Annotation Dependent Depletion; <sup>1</sup>Prediction score sum includes = SIFT, PolyPhen-2, Mutation assessor, PROVEAN, [and](#) MutationTaster2

**Table S13.**

*Summary of Confirmation Notes for the 13 Variants Prioritized from Filtering Workflow 2 Output Sequenced in Family Members.*

| Gene                                                                               | rsID/<br>chromosomal<br>location (hg38) | c.DNA                  | AA change                        | Famil<br>y    | TEGI Affected<br>with<br>variant | Total in<br>family | Confirmation Note                                                      | Previous<br>Phenotype                                   |
|------------------------------------------------------------------------------------|-----------------------------------------|------------------------|----------------------------------|---------------|----------------------------------|--------------------|------------------------------------------------------------------------|---------------------------------------------------------|
| <b>Confirmed and sequenced in additional probands</b>                              |                                         |                        |                                  |               |                                  |                    |                                                                        |                                                         |
| <i>FLNB</i>                                                                        | rs116826041                             | c.6959T>C              | p.Ile2319Thr                     | 4132          | 3                                | 6                  | -confirmed in branch 1                                                 | SLI/DLD                                                 |
| <i>GLI3</i>                                                                        | rs35364414                              | c.4609C>T              | p.Arg1537Cys                     | 4093,         | 3                                | 4                  | -confirmed in branch 1 (not in TEGI UNaff sibling)                     | Aphasia                                                 |
|                                                                                    |                                         |                        |                                  | 4130,         | 3                                | 2                  |                                                                        |                                                         |
|                                                                                    |                                         |                        |                                  | 4132          | 3                                | 6                  |                                                                        |                                                         |
| <i>KMT2D</i>                                                                       | rs146044282                             | c.10256A>G             | p.Asp3419Gly                     | 5463          | 2                                | 3                  | -from omnibus AFF dad                                                  | SLI/DLD                                                 |
| <b>Confirmed but not co-segregating and NOT selected for additional sequencing</b> |                                         |                        |                                  |               |                                  |                    |                                                                        |                                                         |
| <i>SCN9A</i>                                                                       | rs202110802                             | c.317T>C               | p.Leu106Ser                      | 4132          | 2                                | 6                  | -proband's child (TEGI AFF) did not inherit                            | SLI/DLD                                                 |
|                                                                                    | rs200391162                             | c.1109C>T              | p.Thr370Met                      | 5886          | 3                                | 4                  | -from omnibus UNaff dad                                                |                                                         |
| <i>KIAA0319</i>                                                                    | rs113411083                             | c.2164G>A              | p.Arg722Trp                      | 5886          | 2                                | 4                  | -not in the TEGI AFF twin siblings                                     | DL, SSD,<br>SLI/ DLD,<br>CAS, ASD<br>CAS                |
| <i>ZFHX4</i>                                                                       | rs142555710                             | c.9341G>A              | p.Gly3114Asp                     | 4093          | 2                                | 4                  | -from omnibus UNaff mom, in TEGI UNaff sibling                         | SLI/DLD                                                 |
| <i>FAT3</i>                                                                        | rs80293525                              | c.2681G>A              | p.Arg894Gln                      | 4379          | 2                                | 3                  |                                                                        |                                                         |
| <i>GRIN2B</i>                                                                      | rs145021339                             | c.1768G>A              | p.Ala590Thr                      | 4132          | 1                                | 6                  | -not present in two TEGI AFF in which variant was called in WES output | ID, ASD                                                 |
| <i>COL4A2</i>                                                                      | rs117412802                             | c.3368A>G              | p.Glu1123Gly                     | 5463          | 2                                | 3                  | -from omnibus UNaff mom                                                | SLI/DLD                                                 |
| <i>NOP9</i>                                                                        | chr14:24300643                          | c.483_484<br>'->(GAG)3 | p.Glu169_<br>Asp170<br>ins(Glu)3 | 4130,         |                                  |                    | -(GAG) <sub>9</sub> GA genotype in TEGI AFF                            | SLI/DLD                                                 |
|                                                                                    |                                         |                        |                                  | 4132          |                                  |                    | -(GAG) <sub>9</sub> GA or (GAG) <sub>10</sub> GA genotype in TEGI AFF  |                                                         |
| <i>CHRNA3</i>                                                                      | chr15:78601954                          | c.688G>A               | p.Asp230Asn                      | 5886          | 3                                | 4                  | -from omnibus UNaff mom                                                | SLI/DLD                                                 |
| <i>GRIN2A</i>                                                                      | chr16:9763667                           | c.3877G>T              | p.Asp1293Tyr                     | 4132          | 2                                | 6                  | -proband and proband's child only                                      | Focal epilepsy with speech disorder, with or without ID |
| <b>No primers designed</b>                                                         |                                         |                        |                                  |               |                                  |                    |                                                                        |                                                         |
| <i>PTEN</i>                                                                        | chr10:87864103-4                        | ALT = 0*               |                                  | 4132,<br>5886 |                                  |                    |                                                                        | ASD                                                     |

*Note.* AA= amino acid; light grey = not followed up in families; \*0 called as alternate allele by GATK (Genome Analysis Toolkit); #different number of repeats than called by exome data; SLI/DLD = specific language impairment/developmental language disorder; DL = dyslexia; CAS = childhood apraxia of speech; ID = intellectual disability; SSD = other speech sound disorders; ASD = autism spectrum disorder; grey = not relevant due to different number of repeats in different affected family members; Confirmation notes include additional notes when relevant, such as when the variant is inherited from a parent affected on a standardized omnibus language measure or when a sibling who is unaffected on the TEGI carries or does not carry the variant; AFF = affected; UNaff = unaffected; NA = not available

**Table S14a.***Number of Variants on Chromosome 3q13.12-q13.31: Familywise Filtering Workflow 2a.*

|                                                                                                 | 4093 | 4130 | 4132 | 4075 | 4379 | 5463 | 5886 | 5931 |
|-------------------------------------------------------------------------------------------------|------|------|------|------|------|------|------|------|
| chr3:107271010-116470713                                                                        | 55   | 11   | 55   | 48   | 44   | 38   | 51   | 22   |
| Remove: segmentally duplicated                                                                  | 55   | 11   | 55   | 48   | 42   | 38   | 51   | 22   |
| Keep: gnomAD global MAF < 0.07                                                                  | 48   | 8    | 47   | 40   | 36   | 35   | 45   | 21   |
| Remove: synonymous                                                                              | 46   | 7    | 44   | 36   | 33   | 32   | 44   | 15   |
| Keep: carried by $\geq 2$ family members affected on TEGI                                       | 12   | 4    | 13   | 11   | 5    | 11   | 10   | 4    |
| Keep: exonic OR splicing                                                                        | 3    | 3    | 2    | 2    | 1    | 4    | 5    | 4    |
| Keep: CADD pred score $\geq 20$                                                                 | 3    | 1    | 1    | 1    | 1    | 1    | 3    | 2    |
| Keep: positive GERP score                                                                       | 3    | 1    | 1    | 1    | 1    | 1    | 3    | 1    |
| Remove: bioinformatic prediction score sums <sup>1</sup> = 0/5, 1/5, 0/4, 1/4, 0/3              | 3    | 0    | 1    | 1    | 1    | 1    | 3    | 0    |
| Total number of shared genes = 3                                                                |      |      |      |      |      |      |      |      |
| *1 variant = genotype quality is very low, and many genotypes were called                       |      |      |      |      |      |      |      |      |
| *1 variant is carried by an unaffected individual in family 5463 (listed in full in Table A 13) |      |      |      |      |      |      |      |      |

*Note.* MAF = minor allele frequency; GERP = Genomic Evolutionary Rate Profiling; CADD = Combined Annotation Dependent Depletion; <sup>1</sup>Prediction score sum includes = SIFT, PolyPhen-2, Mutation assessor, PROVEAN, MutationTaster2

**Table S14b.***Variants prioritized familywise within RD region: chr3q13.12-q13.31, previously significantly associated with TEGI phenotype.*

| Family(s)  | Gene           | Genomic Position (hg38) chr3 | rsID        |
|------------|----------------|------------------------------|-------------|
| 4093       | <i>CCDC191</i> | 114046612                    | rs138852073 |
| 4093, 5886 | <i>USF3*</i>   | 113658634                    | -           |
| 4075       | <i>GTPBP8</i>  | 112991286                    | rs114429530 |
| 5463, 5886 | <i>CIP2A</i>   | 108585142                    | rs34788499  |
| 489        | <i>SPICE1</i>  | 113468801                    | rs73239152  |

*Note.* \*cross-referencing step revealed that four individuals with low TEGI performance carry a variant on the same gene

**Table S14c.***Number of Variants on Chromosome 6p21.1-p22.3: Family Filtering Workflow 2a.*

|                                                                                        | 4093 | 4130 | 4132 | 4075 | 4379 | 5463 | 5886 | 5931 |
|----------------------------------------------------------------------------------------|------|------|------|------|------|------|------|------|
| chr6:21725992-41417847                                                                 | 121  | 29   | 207  | 120  | 86   | 117  | 128  | 79   |
| Remove: segmentally duplicated                                                         | 111  | 25   | 194  | 113  | 78   | 110  | 120  | 75   |
| Keep: gnomAD global MAF < 0.07                                                         | 98   | 18   | 173  | 95   | 70   | 88   | 104  | 70   |
| Remove: synonymous                                                                     | 81   | 16   | 151  | 86   | 66   | 80   | 96   | 46   |
| Keep: carried by $\geq 2$ family members affected on TEGI                              | 14   | 4    | 16   | 13   | 6    | 16   | 22   | 0    |
| Keep: exonic OR splicing                                                               | 3    | 4    | 6    | 5    | 0    | 1    | 7    | 0    |
| Keep: CADD pred score $\geq 20$                                                        | 3    | 3    | 4    | 3    | 0    | 0    | 4    | 0    |
| Keep: positive GERP score                                                              | 3    | 3    | 4    | 2    | 0    | 0    | 4    | 0    |
| Remove: bioinformatic prediction score sums <sup>1</sup> = 0/5, 1/5, 0/4, 1/4, 0/3     | 2    | 2    | 3    | 2    | 0    | 0    | 3    | 0    |
| Total number of shared genes = 2 (3 unique variants)<br>(listed in full in Table A 14) |      |      |      |      |      |      |      |      |

*Note.* MAF = minor allele frequency; GERP = Genomic Evolutionary Rate Profiling; CADD = Combined Annotation Dependent Depletion; <sup>1</sup>Prediction score sum includes = SIFT, PolyPhen-2, Mutation assessor, PROVEAN, MutationTaster2

**Table S14d.**

*Variants prioritized familywise within RD region: chr6p21.1-p22.33q13.12-q13.31, previously significantly associated with TEGI phenotype.*

| Family(s)  | Gene            | Genomic Position (hg38) chr6 | rsID        | Note                |
|------------|-----------------|------------------------------|-------------|---------------------|
| 4093       | <i>HIST1H4I</i> | 27139442                     | -           |                     |
| 4093       | <i>BTN2A1</i>   | 26458677                     | -           |                     |
| 4130       | <i>DNAH8</i>    | 38938181                     | rs61757218  |                     |
| 4130       | <i>TSPO2</i>    | 41042779                     | rs41273356  |                     |
| 4132       | <i>HFE</i>      | 26092913                     | rs1800562   |                     |
| 4132, 4075 | <i>FGD2*</i>    | 37011707                     | -           |                     |
| 4132       | <i>SLC17A4*</i> | 25776649                     | rs376955338 |                     |
| 5886       |                 | 25773649                     | rs145440760 |                     |
| 4075       | <i>DAAM2</i>    | 39878255                     | -           |                     |
| 5886       | <i>KCNK16</i>   | 39317794                     | rs146487869 |                     |
| 5886       | <i>KIAA0319</i> | 24566725                     | rs113411083 | Candidate gene list |

*Note.* \*cross-referencing step revealed that four individuals with low TEGI performance carry a variant on the same gene

**Table S14e.***Primers used for confirmation of variants in RD regions via sequencing.*

| Family     | Prioritization Workflow | Gene           | Chr | Variant Location (hg38) | Forward Primer           | Reverse Primer        | PCR product size | Optimized Tm | Direction for seq |
|------------|-------------------------|----------------|-----|-------------------------|--------------------------|-----------------------|------------------|--------------|-------------------|
| 4093, 5886 | RD regions              | <i>USF3</i>    | 3   | 113658634               | CAAGTACTGACTGTGTTTCTGAGG | GGAATGATGCTGTGGAGGAT  | 296              | 56°          | Fwd               |
| 4132, 4075 |                         | <i>FGD2</i>    | 6   | 37011707                | aacctcccctgccttcttt      | cctaggaggctgaacctagc  | 400              | 56°          | Fwd               |
| 4132       |                         | <i>SLC17A4</i> | 6   | 25776649                | cagtctgtccaaggtgtctg     | ggggtaggaggacaaacaca  | 291              | 56°          | Fwd               |
| 5886       |                         |                |     | 25773649                | tcttcagGACTGTTACCA       | aggtcctgcctggctcctaat | 291              | 56°          | Fwd               |

*Note.* \*primer pair used to initially amplify genomic region, ^primer pair used internally to amplify prioritized variant
